# Supplementary material
Source: publisher site journal article supplement (https://www.dovepress.com/article/376759)
Supplement: Supplementary file 1 [file get_supplementary_file.php]

# Retrieval strategy

## PubMed database

|     |                                              |
|-----|----------------------------------------------|
| #1  | stroke [MeSH terms]                          |
| #2  | post-stroke [text word]                      |
| #3  | apoplexy [text word]                         |
| #4  | cognitive dysfunction [MeSH terms]           |
| #5  | cognition impairment [text word]             |
| #6  | cognitive disorder [text word]               |
| #7  | cognitive function obstacle [text word]      |
| #8  | cognition function barrier [text word]       |
| #9  | #1 OR #2 OR #3 OR #4 OR #5 OR #6 OR #7 OR #8 |
| #10 | acupuncture [MeSH terms]                     |
| #11 | electric acupuncture [text word]             |
| #12 | auricular acupuncture [text word]            |
| #13 | scalp acupuncture [text word]                |
| #14 | #10 OR #11 OR #12 OR #13                     |
| #15 | systematic review [text word]                |
| #16 | systematic evaluation [text word]            |
| #17 | meta-analysis [text word]                    |
| #18 | #15 OR #16 OR #17                            |
| #19 | #9 and #14 and #18                           |

## the Cochrane library database

|     |                                              |
|-----|----------------------------------------------|
| #1  | stroke:MeSH                                  |
| #2  | (post-stroke):ti,ab,kw                       |
| #3  | (apoplexy):ti,ab,kw                          |
| #4  | cognitive dysfunction:MeSH                   |
| #5  | (cognition impairment):ti,ab,kw              |
| #6  | (cognitive disorder):ti,ab,kw                |
| #7  | (cognitive function obstacle):ti,ab,kw       |
| #8  | (cognition function barrier):ti,ab,kw        |
| #9  | #1 OR #2 OR #3 OR #4 OR #5 OR #6 OR #7 OR #8 |
| #10 | acupuncture: MeSH                            |
| #11 | (electric acupuncture):ti,ab,kw              |
| #12 | (auricular acupuncture):ti,ab,kw             |

|     |                                  |
|-----|----------------------------------|
| #13 | (scalp acupuncture):ti,ab,kw     |
| #14 | #10 OR #11 OR #12 OR #13         |
| #15 | (systematic review):ti,ab,kw     |
| #16 | (systematic evaluation):ti,ab,kw |
| #17 | (meta-analysis):ti,ab,kw         |
| #18 | #15 OR #16 OR #17                |
| #19 | #9 AND #14 AND #18               |

#### Embase database

|    |                                                                                                                                                                                                                                                                        |
|----|------------------------------------------------------------------------------------------------------------------------------------------------------------------------------------------------------------------------------------------------------------------------|
| #1 | 'stroke':ti,ab,kw OR 'post stroke':ti,ab,kw OR 'apoplexy':ti,ab,kw<br>OR 'cognitive dysfunction':ti,ab,kw OR 'cognition impairment':ti,ab,kw<br>OR 'cognitive disorder':ti,ab,kw OR 'cognitive function<br>obstacle':ti,ab,kw OR 'cognition function barrier':ti,ab,kw |
| #2 | 'acupuncture':ti,ab,kw OR 'electric acupuncture':ti,ab,kw OR 'auricular<br>acupuncture':ti,ab,kw OR 'scalp acupuncture':ti,ab,kw                                                                                                                                       |
| #3 | 'systematic review':ti,ab,kw OR 'systematic evaluation':ti,ab,kw<br>OR 'meta analysis':ti,ab,kw                                                                                                                                                                        |
| #4 | #1 and #2 and #3                                                                                                                                                                                                                                                       |

#### SinoMed database

- 1) "stroke" [Common fields: intelligence] OR "post-stroke" [Common fields: intelligence] OR "apoplexy" [Common fields: intelligence]
- 2) "cognitive dysfunction" [Common field: intelligence] OR "cognitive impairment" [Common field: intelligence] OR "cognitive disorder" [Common field: intelligence] OR "cognitive function obstacle" [Common field: intelligence] OR "cognition function barrier" [Common field: intelligence]
- 3) "acupuncture" [Common fields: intelligence] OR "needle" [Common fields: intelligence] OR "electric acupuncture" [Common fields: intelligence] OR "scalp acupuncture" [Common fields: intelligence] OR "auricular acupuncture" [Common fields: intelligence]"
- 4) "systematic review" [Common fields: intelligence] OR "systematic evaluation" [Common fields: intelligence] OR "meta analysis" [Common fields: intelligence]

5) (#1) AND (#2) AND (#3) AND (#4)

CNKI database

SU=('stroke'+ 'post-stroke'+ 'apoplexy') AND SU=('cognitive dysfunction'+ 'cognition impairment'+ 'cognitive disorder'+ 'cognitive function obstacle'+ 'cognition function barrier') AND SU=('acupuncture'+ 'electric acupuncture'+ 'scalp acupuncture'+ 'auricular acupuncture') AND SU=('systematic review'+ 'systematic evaluation'+ 'meta analysis')

Wanfang database

Subject: (“stroke” or “post-stroke” or “apoplexy”) and Subject: (“cognitive dysfunction” or “cognition impairment” or “cognitive disorder” or “cognitive function obstacle” or “cognition function barrier”) and Subject: (“acupuncture” or “electric acupuncture” or “scalp acupuncture” or “auricular acupuncture”) and Subject: (“systematic review” or “systematic evaluation” or “meta analysis”)

VIP database

U=((stroke+post-stroke+apoplexy) AND U=(cognitive dysfunction+cognition impairment+cognitive disorder+cognitive function obstacle+cognition function barrier) AND U=(acupuncture+electric acupuncture+scalp acupuncture+auricular acupuncture) AND U=(systematic review+systematic evaluation+meta analysis)

## Excluded list

| Citation                                                                                                                                                                                                                                                                         | Reason for exclusion                 |
|----------------------------------------------------------------------------------------------------------------------------------------------------------------------------------------------------------------------------------------------------------------------------------|--------------------------------------|
| Xie Yingye, Cai Lin, Xie Meifeng, Peng Rongrong, Shao Ying. Meta-analysis of acupuncture combined with traditional Chinese medicine in the treatment of vascular dementia [J]. <i>New traditional Chinese medicine</i> ,2014,46(2): 20-202.                                      | Not post-stroke cognitive impairment |
| Tan Jingfei, Xu Xiu, Zhang Zhongping, Shi Jian, Lian Mengjie. Meta-analysis of blood circulation therapy combined with acupuncture in the treatment of vascular cognitive impairment [J]. <i>Chin J med</i> ,2020,17(26):139-144.                                                | Not post-stroke cognitive impairment |
| Zhu Chan, Zhang Qiang, Han Xuke, Yao Chengjiao, Liu Jing, Shao Ming. Metrology and visualization analysis of English literature on acupuncture and moxibustion for cerebral apoplexy in recent 10 years [J]. <i>Chinese Journal of Clinical Medicine</i> , 201,33(10):1933-1940. | Not systematic review                |
| Yuan Aihong. Research status of acupuncture and moxibustion in the treatment of cognitive impairment after stroke in recent 5 years [C]. 2017.                                                                                                                                   | Not systematic review                |
| Li JP. Systematic evaluation of a randomized controlled trial of jin three-needle therapy for stroke [D]. <i>Guangzhou University of Chinese Medicine</i> ,2016.                                                                                                                 | Not post-stroke cognitive impairment |
| Hung CY, Wu XY, Chung VC, Tang EC, Wu JC, Lau AY. Overview of systematic reviews with meta-analyses on acupuncture in post-stroke cognitive impairment and depression management. <i>Integr Med Res</i> . 2019 Sep;8(3):145-159.                                                 | Not systematic review                |
| Nie Rongrong, Fu Wenbin. Systematic evaluation of acupuncture and western medicine in the treatment of post-stroke depression [C]. 2011.                                                                                                                                         | Not post-stroke cognitive impairment |
| Zhang J. Systematic evaluation of electroacupuncture in the treatment of stroke in a randomized controlled trial [D]. 2018.                                                                                                                                                      | Not post-stroke cognitive impairment |
| Tang Y, Wang T, Yang L, Zou X, Zhou J, Wu J, Yang J. Acupuncture for post-operative cognitive dysfunction: a systematic review and meta-analysis of randomized controlled trials. <i>Acupunct Med</i> . 2021 Oct;39(5):423-431.                                                  | Not post-stroke cognitive impairment |
| Zhang H , Park M , Yan Y , et al. Scalp acupuncture for post-stroke cognitive impairment: A systematic review and meta-analysis <i>IBRO Reports</i> , 2019, 6:S442.                                                                                                              | Full text unavailable                |
